# Supplementary material for: Synthetic Circular RNA Functions as a miR-21 Sponge to Suppress Gastric Carcinoma Cell Proliferation
Source: PubMed Central journal article supplement — Mol Ther Nucleic Acids. 2018 Sep 22;13:312–21. doi: 10.1016/j.omtn.2018.09.010 (PMC6197335; doi:10.1016/j.omtn.2018.09.010), 2018-09-22
Supplement: mmc1.pdf [file mmc1.pdf]

OMTN, Volume 13

## **Supplemental Information**

### **Synthetic Circular RNA Functions as a miR-21**

#### **Sponge to Suppress Gastric Carcinoma**

#### **Cell Proliferation**

**Xi Liu, John M. Abraham, Yulan Cheng, Zhixiong Wang, Zhe Wang, Guanjun Zhang, Hassan Ashktorab, Duane T. Smoot, Robert N. Cole, Tatiana N. Boronina, Lauren R. DeVine, C. Conover Talbot Jr., Zhengwen Liu, and Stephen J. Meltzer**

| Entrez Symbol<br>(updated<br>curatedMar-17) | 1h (ratio)             |                    | 8h (ratio)             |                    | 24h (ratio)            |                    |
|---------------------------------------------|------------------------|--------------------|------------------------|--------------------|------------------------|--------------------|
|                                             | ScRNA21/<br>blank-Cont | ScRNA21/<br>nscRNA | ScRNA21/<br>blank-Cont | ScRNA21/<br>nscRNA | ScRNA21/<br>blank-Cont | ScRNA21/<br>nscRNA |
|                                             | GRB2                   | 1.01               | 0.87                   | 1.08               | 1                      | 2.37               |
| PPP1CC                                      | 1.18                   | 0.85               | 1.26                   | 0.95               | 1.86                   | 1.61               |
| TSNAX                                       | 0.88                   | 1                  | 1.43                   | 1.39               | 1.17                   | 0.88               |
| CDC42SE2                                    | 0.87                   | 1.06               | 0.73                   | 1.17               | 1.7                    | 1.79               |
| C15orf57                                    | 1.46                   | 1.6                | 1.33                   | 1.12               | 0.68                   | 1.06               |
| TRAPPC11                                    | 1.65                   | 1.42               | 1.32                   | 1.04               | 0.82                   | 0.87               |
| SARAF                                       | 0.74                   | 0.94               | 0.81                   | 0.88               | 1.33                   | 2.19               |
| DUT                                         | 1.36                   | 1.03               | 1.09                   | 1.13               | 2.28                   | 1.95               |
| CHMP1A                                      | 1.65                   | 1.57               | 0.93                   | 0.64               | 1.57                   | 1.76               |
| DAXX                                        | 0.99                   | 1.02               | 1.33                   | 1.56               | 0.51                   | 0.55               |
| TTPAL                                       | 1.58                   | 1.21               | 1.03                   | 1.2                | 0.72                   | 0.55               |
| RPRD1B                                      | 1.02                   | 0.88               | 1.29                   | 1.17               | 3.2                    | 2.63               |
| SLX4IP                                      | 0.99                   | 0.99               | 1.22                   | 0.98               | 2.39                   | 2.04               |
| SNX5                                        | 1.71                   | 1.18               | 0.81                   | 0.76               | 1.85                   | 2.25               |
| CEBPB                                       | 0.8                    | 0.77               | 1.49                   | 1.57               | 1.11                   | 1.04               |
| STAMBPL1                                    | 1.28                   | 1.24               | 1.08                   | 1.46               | 1.24                   | 0.91               |
| PRUNE1                                      | 0.99                   | 0.81               | 0.96                   | 0.82               | 1.49                   | 1.79               |
| PHYHIPL                                     | 0.31                   | 0.78               | 1.55                   | 1.05               | 0.96                   | 0.87               |
| RYBP                                        | 0.89                   | 0.76               | 1.17                   | 1.48               | 0.8                    | 0.8                |

**Supplementary Table 1. Results of Tandem Mass Tag global proteomic analysis of  
scRNA21-treated NCI-N87 GC cells**

Cells in table display arithmetic fold-change ratios of scRNA21-treated vs. nsc-treated or untreated (“blank-cont”) control cells. Ratios are displayed after 1 h, 8 h, and 24 h of scRNA treatment. All proteins in this table are putative direct binding targets of miR-21, as predicted by Ingenuity Pathway Analysis (there were 235 such target proteins among the 6,314 proteins ID'd by TMT). All HIGHLIGHTED proteins in this table increased by at least 2 SD over control at one or more treatment timepoints.
